# Supplementary material for: Novel Approach for Suppression of Ettringite Formation in Sulfate-Bearing Soil Using Blends of Nano-Magnesium Oxide, Ground Granulated Blast-Furnace Slag and Rice Husk Ash
Source: MDPI journal article supplement (doi:10.3390/app11146618), 2021-07-19
Supplement: s1 [file s1]

Article

# Novel Approach for Suppression of Ettringite Formation in Sulfate-Bearing Soil Using Blends of Nano-Magnesium Oxide, Ground Granulated Blast-Furnace Slag and Rice Husk Ash

Khaled Ibrahim Azarroug Ehwaitat, Mohd Ashraf Mohamad Ismail \* and Ali Muftah Abdussalam Ezreig

School of Civil Engineering, Universiti Sains Malaysia, Engineering Campus, Nibong Tebal 14300, Seberang Prai Selatan, Pulau Pinang, Malaysia; Khaledazrog@student.usm.my (K.I.A.E.); Aliezeig@student.usm.my (A.M.A.E.)

\* Correspondence: ceashraf@usm.my

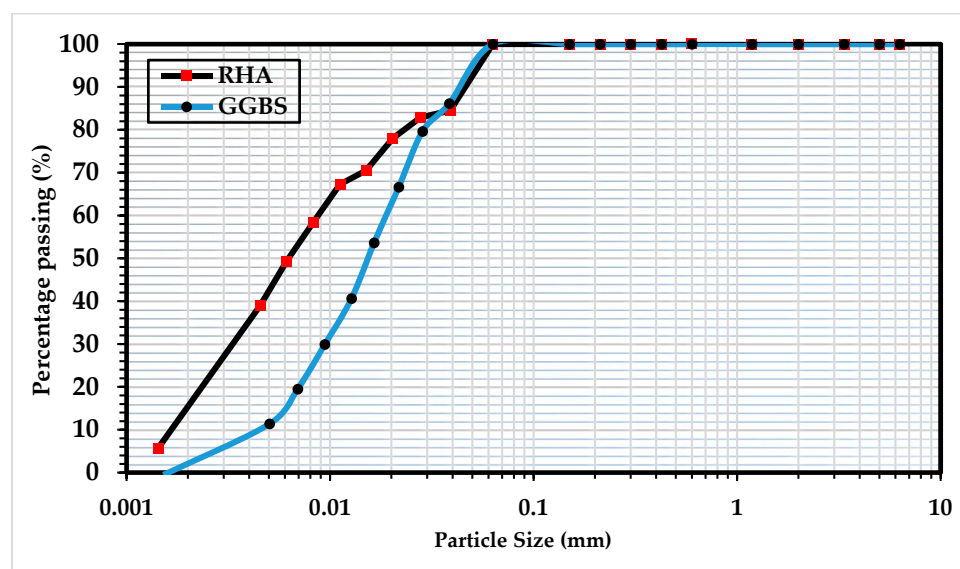

Figure S1. Particle size distribution (PSD) of RHA and GGBS used in this study.
